# Supplementary material
Source: Springer Nature journal article supplement (https://www.springermedizin.de/resource/supplementary/12936_2011_1803_MOESM4_ESM.pdf/9541802)
Supplement: MOESM4 [file 9541802]

Contextual Factors & Broader Weaknesses in the Health System

**Uncomplicated malaria diagnosed**  
(presumptive/confirmed depending on availability/use of diagnostic test)

**No ACT Stock at health facility**

**ACT Stock at health facility**

**Alternative treatment prescribed**

**Patient is referred to alternative provider**

**ACT prescribed**

**ACT Stock**

**Alternative treatment dispensed**

**No ACT Stock**

**ACT not dispensed**

**ACT not dispensed**

**Patient leaves facility without effective & appropriate ACT**

**ACT prescribed & dispensed**
